# Supplementary material for: An Early Neoplasia Index (ENI10), Based on Molecular Identity of CD10 Cells and Associated Stemness Biomarkers, is a Predictor of Patient Outcome in Many Cancers
Source: PubMed Central journal article supplement (PMC10540743; doi:10.1158/2767-9764.crc-23-0196), 2023-09-29
Supplement: crc-23-0196-s01.pdf [file crc-23-0196-s01.pdf]

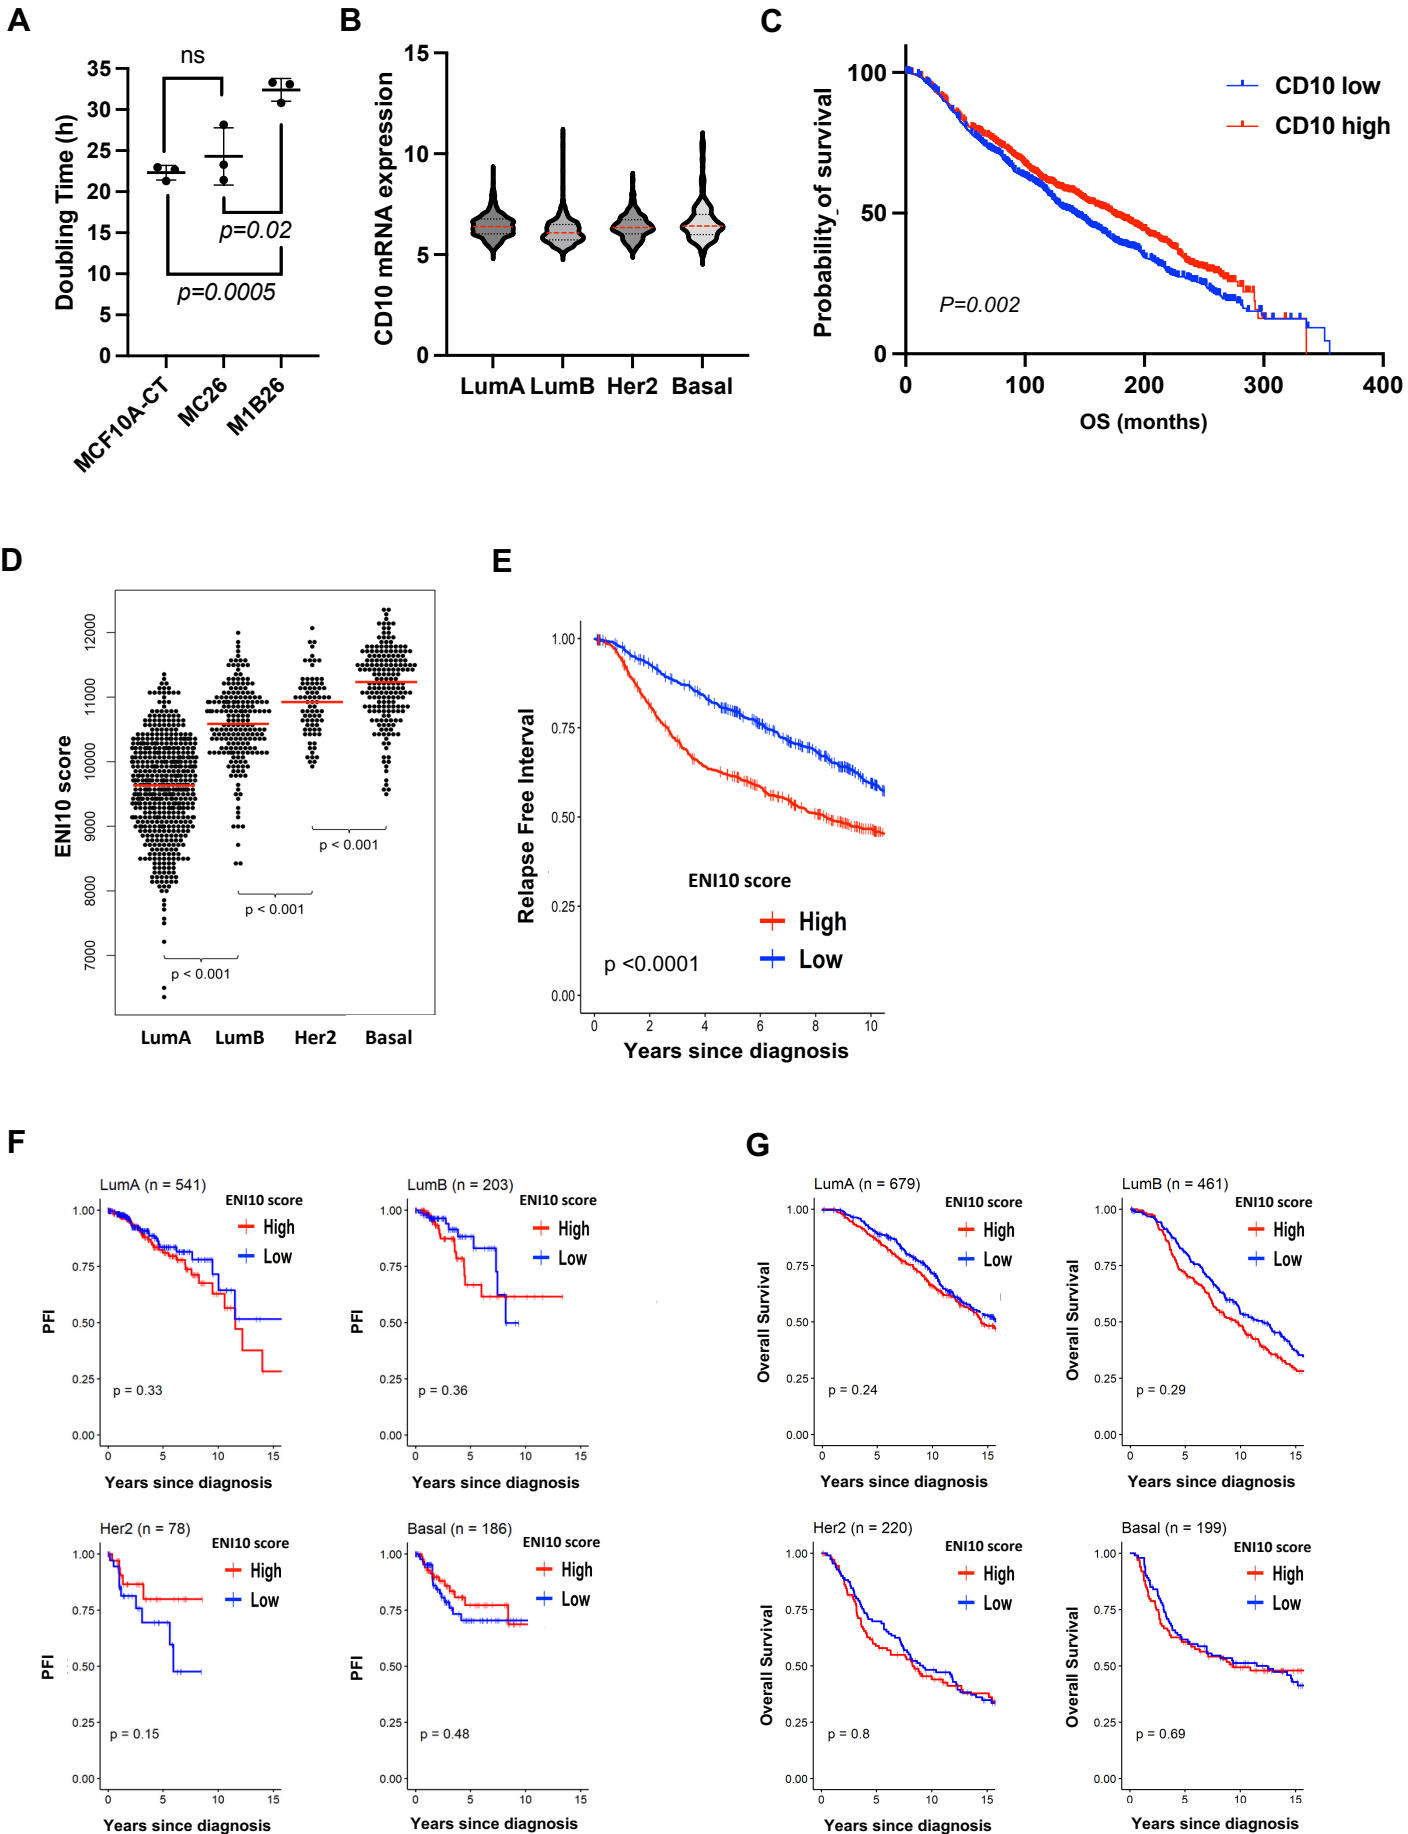

**Supplementary Figure S1.** A, Doubling time in hours of the indicated cell lines. Three independent replicates are shown with the mean and standard deviation. B, CD10 transcript expression in the breast tumors of the METABRIC database according to molecular subtypes. C, Kaplan-Meier plot of breast cancers patients in the METABRIC cohort as a function of CD10 expression level. D, ssGSEA ENI10 score of breast tumor according to cancer molecular subtypes from the METABRIC database. E, Kaplan-Meier plot of breast cancers patients in the METABRIC cohort divided by the median of the ENI10 score (low scores in blue and high scores in red). F, Kaplan-Meier plot of breast cancers patients in the TCGA-BRCA cohort according to the ENI10 score (as in E) and the molecular subtypes. G, Kaplan-Meier plot of breast cancers patients in the METABRIC cohort according to the ENI10 score (as in E) and the molecular subtypes.
