# Supplementary material for: An Early Neoplasia Index (ENI10), Based on Molecular Identity of CD10 Cells and Associated Stemness Biomarkers, is a Predictor of Patient Outcome in Many Cancers
Source: PubMed Central journal article supplement (PMC10540743; doi:10.1158/2767-9764.crc-23-0196), 2023-09-29
Supplement: crc-23-0196-s02.pdf [file crc-23-0196-s02.pdf]

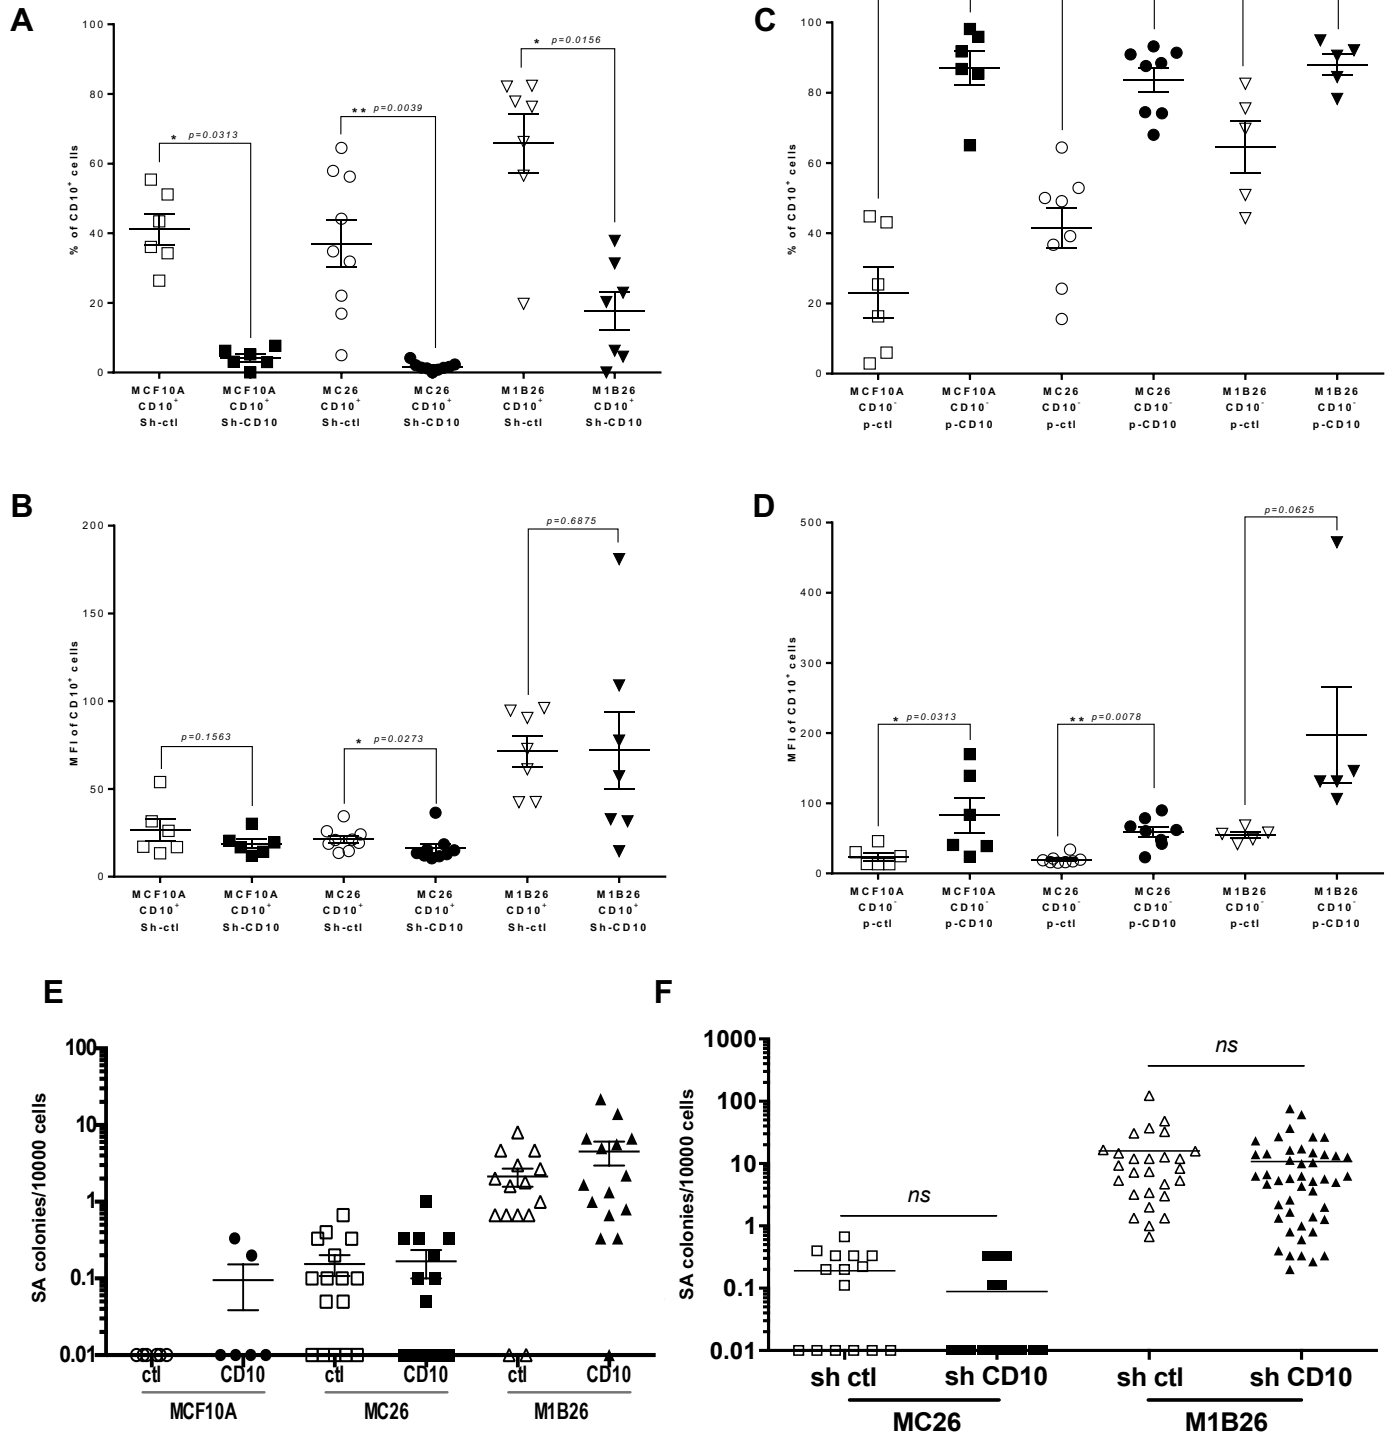

**Supplementary Figure S2.** A,B, FACS sorted CD10<sup>+</sup> MCF10A-CT (squares), MC26 (circles) or M1B26 (triangles) cells were transduced with a lentiviral vector expressing a shRNA targeting CD10 (sh-CD10, black symbols) or a control shRNA (sh-ctl, open symbols). CD10 membrane expression was then measured by flow-cytometry and results shown as percentage of CD10<sup>+</sup> cells (A) or CD10 MFI (mean fluorescence intensity) of CD10<sup>+</sup> cells (B). C, D, FACS sorted CD10<sup>-</sup> MCF10A-CT (squares), MC26 (circles) or M1B26 (triangles) cells were transduced with a lentiviral CD10 expression vector (p-CD10, black symbols) or a control, empty vector (p-ctl, open symbols). CD10 membrane expression was then measured by flow-cytometry and results shown as percentage of CD10<sup>+</sup> cells (C) or CD10 MFI (mean fluorescence intensity) of CD10<sup>+</sup> cells (D). E, Soft-agar colony formation assay with sorted CD10<sup>-</sup> MCF10A-CT, MC26 and M1B26 cells infected by lentiviruses carrying an empty (ctl) or CD10 expression vector. F, Soft-agar colony formation assay with MC26 (*n*=21) or M1B26 (*n*=29) cells expressing a scramble (sh ctl) or CD10 specific shRNA.
