# Supplementary material for: An Early Neoplasia Index (ENI10), Based on Molecular Identity of CD10 Cells and Associated Stemness Biomarkers, is a Predictor of Patient Outcome in Many Cancers
Source: PubMed Central journal article supplement (PMC10540743; doi:10.1158/2767-9764.crc-23-0196), 2023-09-29
Supplement: crc-23-0196-s03.pdf [file crc-23-0196-s03.pdf]

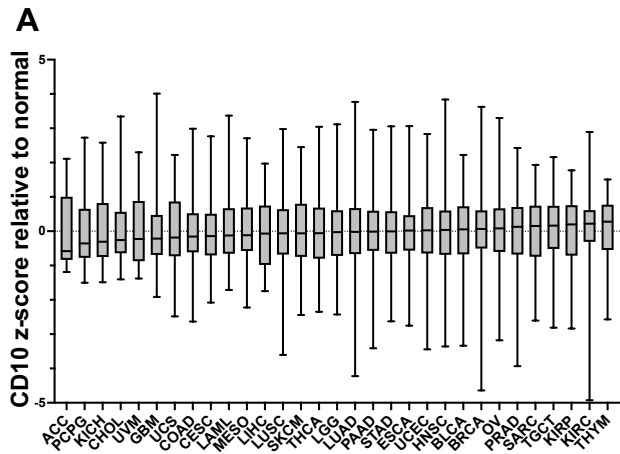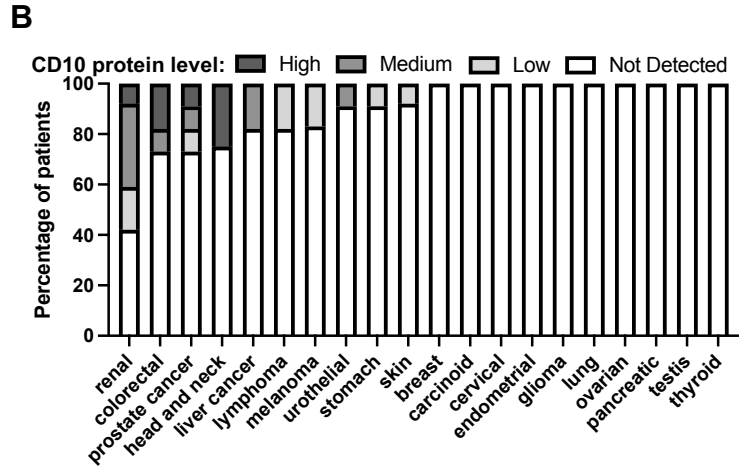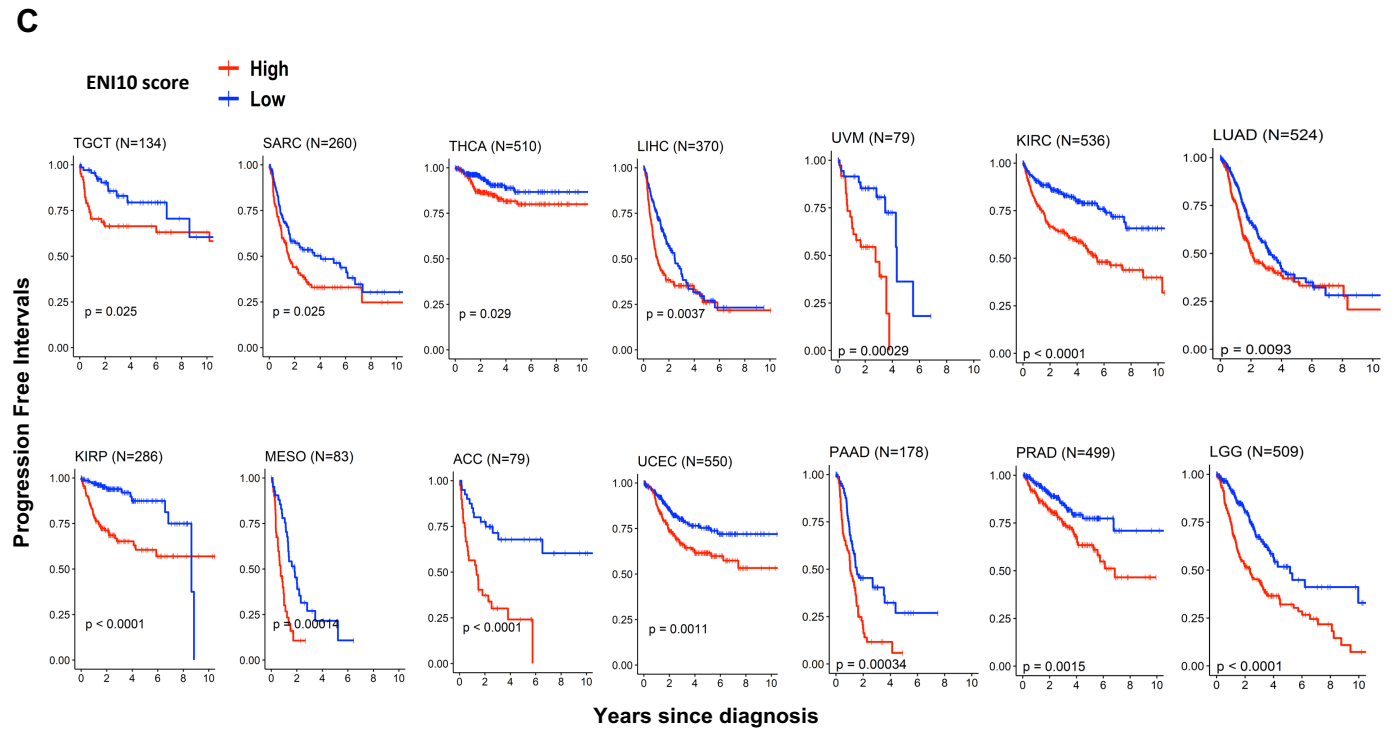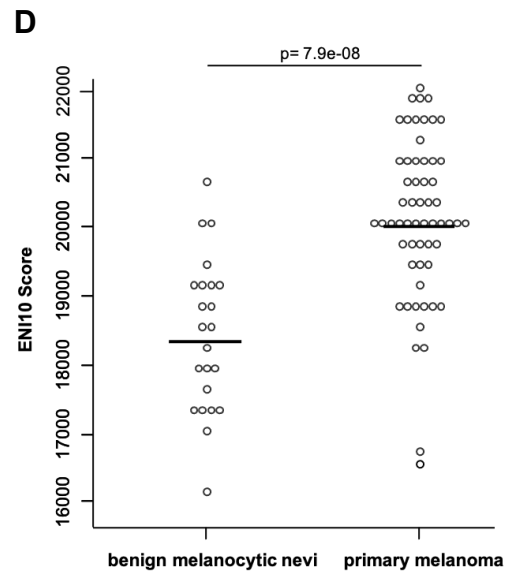

**Supplementary Figure S3.** A, CD10 transcript expression in TCGA tumor types relative to normal samples. B, CD10 protein expression in tumor types from the human protein atlas. C, Kaplan-Meier plot of various cancers patients in the TCGA cohorts divided by the median of the ENI10 score (low scores in blue and high scores in red). D, ssGSEA ENI10 score in transcriptomic data (GSE112509) from benign melanocytic nevi or primary melanoma (47). Each individual sample is indicated by an open circle and the median is shown as a bar.
