# Supplementary material for: An Early Neoplasia Index (ENI10), Based on Molecular Identity of CD10 Cells and Associated Stemness Biomarkers, is a Predictor of Patient Outcome in Many Cancers
Source: PubMed Central journal article supplement (PMC10540743; doi:10.1158/2767-9764.crc-23-0196), 2023-09-29
Supplement: crc-23-0196-s04.pdf [file crc-23-0196-s04.pdf]

# Supplementary Table S1. GO term enrichment analysis comparing MC26 and M1B26 to MCF10A-CT cells.

| MC26                                                            |          | M1B26                                                                 |          | MC26/M1B26                                                             |          | Colonne3 |
|-----------------------------------------------------------------|----------|-----------------------------------------------------------------------|----------|------------------------------------------------------------------------|----------|----------|
| GO term                                                         | p-value  | GO term                                                               | p-value  | GO term                                                                | p-value  |          |
| developmental process (GO:0032502)                              | 5,68E-08 | DNA replication (GO:0006260)                                          | 2,65E-07 | multicellular organismal process (GO:0032501)                          | 1,22E-08 |          |
| multicellular organism development (GO:0007275)                 | 1,62E-07 | negative regulation of cellular process (GO:0048523)                  | 7,24E-07 | developmental process (GO:0032502)                                     | 2,67E-08 |          |
| tissue development (GO:0009888)                                 | 1,70E-07 | cell cycle G1/S phase transition (GO:0044843)                         | 7,89E-07 | multicellular organism development (GO:0007275)                        | 6,75E-08 |          |
| anatomical structure development (GO:0048856)                   | 1,76E-07 | response to stimulus (GO:0050896)                                     | 8,80E-07 | anatomical structure development (GO:0048856)                          | 7,18E-08 |          |
| regulation of developmental process (GO:0050793)                | 2,32E-07 | G1/S transition of mitotic cell cycle (GO:0000082)                    | 8,87E-07 | regulation of signaling (GO:0023051)                                   | 1,03E-07 |          |
| anatomical structure morphogenesis (GO:0009653)                 | 2,37E-07 | response to stress (GO:0006950)                                       | 8,88E-07 | regulation of cell communication (GO:0010646)                          | 1,07E-07 |          |
| regulation of cell proliferation (GO:0042127)                   | 6,79E-07 | mitotic cell cycle phase transition (GO:0044772)                      | 1,05E-06 | regulation of response to stimulus (GO:0048583)                        | 1,15E-07 |          |
| system development (GO:0048731)                                 | 1,10E-06 | DNA-dependent DNA replication (GO:0006261)                            | 1,18E-06 | response to organic substance (GO:0010033)                             | 2,16E-07 |          |
| negative regulation of biological process (GO:0048519)          | 1,17E-05 | anatomical structure development (GO:0048856)                         | 1,27E-06 | regulation of signal transduction (GO:0009966)                         | 3,07E-07 |          |
| negative regulation of cell proliferation (GO:0008285)          | 1,64E-05 | system development (GO:0048731)                                       | 1,37E-06 | system development (GO:0048731)                                        | 3,29E-07 |          |
| regulation of multicellular organismal development (GO:2000026) | 6,30E-05 | negative regulation of biological process (GO:0048519)                | 1,45E-06 | regulation of multicellular organismal process (GO:0051239)            | 9,94E-07 |          |
| negative regulation of cellular process (GO:0048523)            | 6,39E-05 | multicellular organism development (GO:0007275)                       | 1,49E-06 | response to wounding (GO:0009611)                                      | 2,63E-06 |          |
| cellular developmental process (GO:0048869)                     | 9,14E-05 | cell cycle phase transition (GO:0044770)                              | 1,54E-06 | negative regulation of cellular process (GO:0048523)                   | 6,92E-06 |          |
| regulation of multicellular organismal process (GO:0051239)     | 9,50E-05 | cellular response to chemical stimulus (GO:0070887)                   | 2,56E-06 | regulation of anatomical structure morphogenesis (GO:0022603)          | 7,03E-06 |          |
| epithelium development (GO:0060429)                             | 9,59E-05 | response to organic substance (GO:0010033)                            | 2,92E-06 | regulation of proteolysis (GO:0030162)                                 | 7,11E-06 |          |
| cell differentiation (GO:0030154)                               | 9,85E-05 | developmental process (GO:0032502)                                    | 4,80E-06 | positive regulation of biological process (GO:0048518)                 | 7,18E-06 |          |
| multicellular organismal process (GO:0032501)                   | 1,27E-04 | blood vessel morphogenesis (GO:0048514)                               | 5,02E-06 | Unclassified (UNCLASSIFIED)                                            | 1,36E-05 |          |
| animal organ development (GO:0048513)                           | 1,28E-04 | angiogenesis (GO:0001525)                                             | 8,77E-06 | biological_process (GO:0008150)                                        | 1,44E-05 |          |
| extracellular matrix organization (GO:0030198)                  | 2,23E-04 | response to chemical (GO:0042221)                                     | 9,27E-06 | regulation of biological quality (GO:0065008)                          | 1,51E-05 |          |
| response to stress (GO:0006950)                                 | 2,34E-04 | cellular response to organic substance (GO:0071310)                   | 9,97E-06 | response to chemical (GO:0042221)                                      | 2,74E-05 |          |
| biological regulation (GO:0065007)                              | 2,77E-04 | DNA replication initiation (GO:0006270)                               | 1,17E-05 | regulation of multicellular organismal development (GO:2000026)        | 3,48E-05 |          |
| regulation of biological process (GO:0050789)                   | 3,18E-04 | response to cytokine (GO:0034097)                                     | 1,69E-05 | tissue development (GO:0009888)                                        | 3,65E-05 |          |
| extracellular structure organization (GO:0043062)               | 3,25E-04 | biological regulation (GO:0065007)                                    | 2,35E-05 | wound healing (GO:0042060)                                             | 4,41E-05 |          |
| cellular process (GO:0009987)                                   | 4,04E-04 | cellular process (GO:0009987)                                         | 3,98E-05 | negative regulation of biological process (GO:0048519)                 | 5,12E-05 |          |
| regulation of cellular process (GO:0050794)                     | 6,00E-04 | positive regulation of multicellular organismal process (GO:0051240)  | 4,12E-05 | tube morphogenesis (GO:0035239)                                        | 5,44E-05 |          |
| regulation of cellular component biogenesis (GO:0044087)        | 8,29E-04 | anatomical structure formation involved in morphogenesis (GO:0048646) | 4,13E-05 | regulation of developmental process (GO:0050793)                       | 5,55E-05 |          |
| regulation of cell adhesion (GO:0030155)                        | 8,30E-04 | anatomical structure morphogenesis (GO:0009653)                       | 4,50E-05 | secretion by cell (GO:0032940)                                         | 5,93E-05 |          |
| regulation of cellular component organization (GO:0051128)      | 8,76E-04 | positive regulation of angiogenesis (GO:0045766)                      | 4,56E-05 | regulation of vasculature development (GO:1901342)                     | 6,42E-05 |          |
| positive regulation of biological process (GO:0048518)          | 9,40E-04 | positive regulation of developmental process (GO:0051094)             | 6,33E-05 | biological regulation (GO:0065007)                                     | 7,21E-05 |          |
| positive regulation of cellular process (GO:0048522)            | 9,68E-04 | tube morphogenesis (GO:0035239)                                       | 6,91E-05 | anatomical structure formation involved in morphogenesis (GO:0048646)  | 9,70E-05 |          |
|                                                                 |          | tube development (GO:0035295)                                         | 8,07E-05 | regulation of cell differentiation (GO:0045595)                        | 9,80E-05 |          |
|                                                                 |          | response to external stimulus (GO:0009605)                            | 8,08E-05 | cellular response to chemical stimulus (GO:0070887)                    | 1,01E-04 |          |
|                                                                 |          | blood vessel development (GO:0001568)                                 | 8,12E-05 | positive regulation of cellular process (GO:0048522)                   | 1,34E-04 |          |
|                                                                 |          | multicellular organismal process (GO:0032501)                         | 8,22E-05 | anatomical structure development (GO:0048869)                          | 1,36E-04 |          |
|                                                                 |          | positive regulation of vasculature development (GO:1904018)           | 1,10E-04 | regulation of cell proliferation (GO:0042127)                          | 1,48E-04 |          |
|                                                                 |          | regulation of response to stimulus (GO:0048583)                       | 1,13E-04 | positive regulation of signal transduction (GO:0009967)                | 1,54E-04 |          |
|                                                                 |          | vasculature development (GO:0001944)                                  | 1,64E-04 | negative regulation of multicellular organismal process (GO:0051241)   | 1,55E-04 |          |
|                                                                 |          | response to abiotic stimulus (GO:0009628)                             | 1,77E-04 | positive regulation of cell communication (GO:0010647)                 | 1,56E-04 |          |
|                                                                 |          | regulation of localization (GO:0032879)                               | 1,79E-04 | cell differentiation (GO:0030154)                                      | 1,56E-04 |          |
|                                                                 |          | regulation of locomotion (GO:0040012)                                 | 2,00E-04 | blood vessel development (GO:0001568)                                  | 1,58E-04 |          |
|                                                                 |          | cardiovascular system development (GO:0072358)                        | 2,01E-04 | positive regulation of signaling (GO:0023056)                          | 1,63E-04 |          |
|                                                                 |          | mitotic cell cycle process (GO:1903047)                               | 2,01E-04 | positive regulation of apoptotic process (GO:0043065)                  | 1,69E-04 |          |
|                                                                 |          | DNA metabolic process (GO:0006259)                                    | 2,07E-04 | angiogenesis (GO:0001525)                                              | 1,71E-04 |          |
|                                                                 |          | positive regulation of cellular process (GO:0048522)                  | 2,40E-04 | positive regulation of programmed cell death (GO:0043068)              | 1,85E-04 |          |
|                                                                 |          | regulation of cell migration (GO:0030334)                             | 2,41E-04 | regulation of cell migration (GO:0030334)                              | 1,85E-04 |          |
|                                                                 |          | cellular response to cytokine stimulus (GO:0071345)                   | 2,71E-04 | response to oxygen-containing compound (GO:1901700)                    | 1,86E-04 |          |
|                                                                 |          | regulation of catalytic activity (GO:0050790)                         | 2,72E-04 | regulation of cellular component movement (GO:0051270)                 | 1,87E-04 |          |
|                                                                 |          | regulation of cell motility (GO:2000145)                              | 2,73E-04 | epithelium development (GO:0060429)                                    | 1,88E-04 |          |
|                                                                 |          | animal organ development (GO:0048513)                                 | 2,75E-04 | secretion (GO:0046903)                                                 | 2,00E-04 |          |
|                                                                 |          | immune system process (GO:0002376)                                    | 3,16E-04 | regulation of protein metabolic process (GO:0051246)                   | 2,02E-04 |          |
|                                                                 |          | circulatory system development (GO:0072359)                           | 3,19E-04 | regulation of biological process (GO:0050789)                          | 2,02E-04 |          |
|                                                                 |          | regulation of molecular function (GO:0065009)                         | 3,27E-04 | regulation of angiogenesis (GO:0045765)                                | 2,04E-04 |          |
|                                                                 |          | cellular response to oxygen-containing compound (GO:1901701)          | 3,59E-04 | response to stimulus (GO:0050896)                                      | 2,24E-04 |          |
|                                                                 |          | positive regulation of inflammatory response (GO:0050729)             | 4,40E-04 | positive regulation of multicellular organismal process (GO:0051240)   | 2,29E-04 |          |
|                                                                 |          | cellular response to stimulus (GO:0051716)                            | 4,47E-04 | negative regulation of protein metabolic process (GO:0051248)          | 2,32E-04 |          |
|                                                                 |          | regulation of cell proliferation (GO:0042127)                         | 4,93E-04 | vasculature development (GO:0001944)                                   | 2,35E-04 |          |
|                                                                 |          | regulation of cellular component movement (GO:0051270)                | 4,98E-04 | blood vessel morphogenesis (GO:0048514)                                | 2,38E-04 |          |
|                                                                 |          | regulation of developmental process (GO:0050793)                      | 5,07E-04 | regulation of cellular protein metabolic process (GO:0032268)          | 2,65E-04 |          |
|                                                                 |          | cell proliferation (GO:0008283)                                       | 5,44E-04 | cellular response to organic substance (GO:0071310)                    | 2,75E-04 |          |
|                                                                 |          | cell cycle process (GO:0022402)                                       | 5,57E-04 | negative regulation of cellular protein metabolic process (GO:0032269) | 2,80E-04 |          |
|                                                                 |          | biological_process (GO:0008150)                                       | 5,70E-04 | cardiovascular system development (GO:0072358)                         | 2,88E-04 |          |
|                                                                 |          | Unclassified (UNCLASSIFIED)                                           | 5,79E-04 | tube development (GO:0035295)                                          | 3,16E-04 |          |
|                                                                 |          | positive regulation of biological process (GO:0048518)                | 6,36E-04 | regulation of cellular process (GO:0050794)                            | 4,36E-04 |          |
|                                                                 |          | regulation of cellular process (GO:0050794)                           | 6,51E-04 | regulation of cell motility (GO:2000145)                               | 4,72E-04 |          |
|                                                                 |          | cell migration (GO:0016477)                                           | 6,76E-04 | anatomical structure morphogenesis (GO:0009653)                        | 5,01E-04 |          |
|                                                                 |          | organic substance biosynthetic process (GO:1901576)                   | 7,14E-04 | positive regulation of cell differentiation (GO:0045597)               | 5,17E-04 |          |
|                                                                 |          | regulation of biological process (GO:0050789)                         | 7,41E-04 | positive regulation of cell death (GO:0010942)                         | 5,36E-04 |          |
|                                                                 |          | biosynthetic process (GO:0009058)                                     | 7,50E-04 | regulation of cellular component organization (GO:0051128)             | 5,36E-04 |          |
|                                                                 |          | leukocyte activation (GO:0045321)                                     | 7,84E-04 | regulation of molecular function (GO:0065009)                          | 6,49E-04 |          |
|                                                                 |          | regulation of multicellular organismal process (GO:0051239)           | 7,87E-04 | response to molecule of bacterial origin (GO:0002237)                  | 7,00E-04 |          |
|                                                                 |          | cytokine-mediated signaling pathway (GO:0019221)                      | 7,92E-04 | regulation of cell death (GO:0010941)                                  | 7,02E-04 |          |
|                                                                 |          | positive regulation of defense response (GO:0031349)                  | 8,94E-04 | positive regulation of developmental process (GO:0051094)              | 7,63E-04 |          |
|                                                                 |          | response to oxygen-containing compound (GO:1901700)                   | 9,29E-04 | regulation of locomotion (GO:0040012)                                  | 7,91E-04 |          |
|                                                                 |          | cell motility (GO:0048870)                                            | 9,45E-04 | regulation of apoptotic process (GO:0042981)                           | 8,45E-04 |          |
|                                                                 |          | response to endogenous stimulus (GO:0009719)                          | 9,52E-04 | positive regulation of response to stimulus (GO:0048584)               | 8,54E-04 |          |
|                                                                 |          | localization of cell (GO:0051674)                                     | 9,58E-04 | response to peptide (GO:1901652)                                       | 9,29E-04 |          |
|                                                                 |          | cellular developmental process (GO:0048869)                           | 9,64E-04 | cell death (GO:0008219)                                                | 9,60E-04 |          |
|                                                                 |          |                                                                       |          | regulation of localization (GO:0032879)                                | 9,63E-04 |          |
