# Supplementary material for: An Early Neoplasia Index (ENI10), Based on Molecular Identity of CD10 Cells and Associated Stemness Biomarkers, is a Predictor of Patient Outcome in Many Cancers
Source: PubMed Central journal article supplement (PMC10540743; doi:10.1158/2767-9764.crc-23-0196), 2023-09-29
Supplement: crc-23-0196-s05.pdf [file crc-23-0196-s05.pdf]

Supplementary Table S2. Results of a CD10 immuno-histochemistry staining of a breast cancer TMA (Tumor Micro-Array).

|                       | N   | Luminal A<br>N =236 | Luminal B<br>N =145 | HER2 seul<br>N =12 | Triple neg.<br>N =45 | Combined<br>N =438 | Test Statistic                   |
|-----------------------|-----|---------------------|---------------------|--------------------|----------------------|--------------------|----------------------------------|
| CD10 (cat.)           | 383 |                     |                     |                    |                      |                    | $\chi^2_3 = 18.54, P < 0.001$    |
| positive              |     | 1% (1)              | 1% (2)              | 9% (1)             | 11% (4)              | 2% (8)             |                                  |
| CD10 (% marked cells) | 383 |                     |                     |                    |                      |                    | $\chi^2_{15} = 43.26, P < 0.001$ |
| 0                     |     | 99% (196)           | 99% (135)           | 91% (10)           | 89% (34)             | 98% (375)          |                                  |
| 20                    |     | 1% (1)              | 0% (0)              | 0% (0)             | 0% (0)               | 0% (0)             |                                  |
| 30                    |     | 0% (0)              | 0% (0)              | 0% (0)             | 3% (1)               | 0% (0)             |                                  |
| 70                    |     | 0% (0)              | 0% (0)              | 0% (0)             | 5% (1)               | 1% (2)             |                                  |
| 80                    |     | 0% (0)              | 1% (1)              | 0% (0)             | 0% (0)               | 0% (0)             |                                  |
| 90                    |     | 0% (0)              | 1% (1)              | 1% (1)             | 3% (1)               | 1% (3)             |                                  |
| CD10 (stroma)         | 379 |                     |                     |                    |                      |                    | $\chi^2_3 = 1.78, P = 0.62$      |
| positive              |     | 80% (158)           | 79% (106)           | 64% (7)            | 78% (28)             | 79% (299)          |                                  |
