# Supplementary material for: An Early Neoplasia Index (ENI10), Based on Molecular Identity of CD10 Cells and Associated Stemness Biomarkers, is a Predictor of Patient Outcome in Many Cancers
Source: PubMed Central journal article supplement (PMC10540743; doi:10.1158/2767-9764.crc-23-0196), 2023-09-29
Supplement: crc-23-0196-s06.pdf [file crc-23-0196-s06.pdf]

Supplementary Table S3. List of genes constituting the ENI10 signature and its subsets

ENI10

|          |         |         |         |        |          |          |          |
|----------|---------|---------|---------|--------|----------|----------|----------|
| ADRB2    | CCNG2   | CYP1B1  | FAM83D  | IL1R2  | NALCN    | RAB2A    | SMC4     |
| AKR1B1   | CD59    | CYP4B1  | FANCD2  | IL1RL1 | NAMPT    | RANBP17  | SNCAIP   |
| AKR1B10  | CDC25C  | DAB2    | FAP     | KANK2  | NCAPD3   | RPL37A   | SOD2     |
| AKR1C1   | CDCA3   | DAPK1   | FBXO5   | KCNK5  | NCAPG    | RPS27L   | SPAG5    |
| ANLN     | CDCA5   | DCN     | FIBIN   | KIF14  | NCAPG2   | S100A4   | SPC24    |
| AOX1     | CDK1    | DDIAS   | FLRT3   | KIF18B | NCAPH    | S100A7   | SPC25    |
| ASPM     | CENPA   | DDX17   | FN1     | KIF20A | NDC80    | S100P    | SRGN     |
| ATAD2    | CENPE   | DEPDC1  | FOXQ1   | KIF23  | NEK2     | S1PR3    | STIL     |
| ATP6V0E1 | CENPF   | DEPDC1B | FPR1    | KIF2C  | NEURL1B  | SAA2     | SULT1E1  |
| AURKA    | CENPJ   | DIAPH3  | GALNT15 | KIF4A  | NNMT     | SAMSN1   | SUSD2    |
| AURKB    | CEP55   | DKK1    | GAS2L3  | KPNA2  | NUCKS1   | SCNN1B   | SUV39H1  |
| BUB1     | CFB     | DLGAP5  | GOLGA8A | LCN2   | NUDCD2   | SCNN1G   | TACC3    |
| BUB1B    | CFLAR   | EEF1D   | GPR64   | LIMCH1 | NUSAP1   | SERPINA5 | TAF5     |
| C1R      | CKAP2   | EHF     | HEY1    | MASTL  | ORC6     | SERPINE2 | TMEM139  |
| C1S      | CKAP2L  | ENO1    | HJURP   | MCM8   | OSBPL7   | SFTPB    | TMEM194A |
| CASC5    | CLIC3   | ERAP1   | HMGB2   | METTL9 | PAPSS2   | SGOL2    | TNFAIP6  |
| CCDC71L  | CNTN3   | ESPL1   | HMMR    | MGLL   | PDZK1IP1 | SH3RF3   | TOP2A    |
| CCNA2    | COL12A1 | FAM64A  | HPSE    | MKI67  | PI3      | SHCBP1   | TTK      |
| CCNB1    | COL8A1  | FAM72A  | HSP90B1 | MLPH   | PLSCR4   | SLC39A8  | UBE2C    |
| CCNF     | CXCL8   | FAM76B  | IFI44L  | MME    | PRC1     | SLFN5    |          |

ENI10-GO

|       |        |        |        |        |        |       |       |
|-------|--------|--------|--------|--------|--------|-------|-------|
| ANLN  | CCNA2  | CENPF  | FANCD2 | KIF2C  | NDC80  | SPAG5 | TTK   |
| ASPM  | CCNB1  | CENPJ  | FBXO5  | KIF4A  | NEK2   | SPC24 | UBE2C |
| AURKA | CDC25C | CEP55  | GAS2L3 | MASTL  | NUSAP1 | SPC25 |       |
| AURKB | CDCA5  | CKAP2  | KIF14  | NCAPD3 | ORC6   | STIL  |       |
| BUB1  | CDK1   | DLGAP5 | KIF18B | NCAPG  | PRC1   | SUSD2 |       |
| BUB1B | CENPA  | ESPL1  | KIF20A | NCAPG2 | SGOL2  | TACC3 |       |
| CASC5 | CENPE  | FAM83D | KIF23  | NCAPH  | SMC4   | TOP2A |       |

ENI10-SA

|       |       |
|-------|-------|
| BUB1  | PRC1  |
| BUB1B | SPAG5 |
| CENPE | SPC24 |
| CENPJ | SPC25 |
| KIF23 | STIL  |
| KIF4A | TTK   |
| NDC80 |       |
