# Supplementary material for: An Early Neoplasia Index (ENI10), Based on Molecular Identity of CD10 Cells and Associated Stemness Biomarkers, is a Predictor of Patient Outcome in Many Cancers
Source: PubMed Central journal article supplement (PMC10540743; doi:10.1158/2767-9764.crc-23-0196), 2023-09-29
Supplement: crc-23-0196-s07.pdf [file crc-23-0196-s07.pdf]

Supplementary Table S4. Correlation of ENI10 score with drug response of breast cancer Sanger cell lines.

| CANCER | drug              | n cell lines | r IC50             | pval IC50            | p IC50 BH            | signif.    |
|--------|-------------------|--------------|--------------------|----------------------|----------------------|------------|
| BRCA   | Bleomycin (10 uM) | 45           | -0.489586249305978 | 0.000641877912189661 | 0.120993986447751    | yes        |
| BRCA   | IGFR_3801         | 37           | -0.485114400178932 | 0.00234089832769402  | 0.142330134657947    | suggestive |
| BRCA   | Refametinib       | 86           | -0.48225299578049  | 2.57973958996992E-06 | 0.000972561825418661 | yes        |
| BRCA   | Cetuximab         | 44           | -0.455565295933414 | 0.0018869419217173   | 0.142330134657947    | suggestive |
| BRCA   | Bleomycin (50 uM) | 46           | -0.444060602430349 | 0.0019920489484808   | 0.142330134657947    | suggestive |
| BRCA   | IC-87114          | 45           | -0.413418561058339 | 0.00476142963352617  | 0.219926977719365    | suggestive |
