# Supplementary material for: An Early Neoplasia Index (ENI10), Based on Molecular Identity of CD10 Cells and Associated Stemness Biomarkers, is a Predictor of Patient Outcome in Many Cancers
Source: PubMed Central journal article supplement (PMC10540743; doi:10.1158/2767-9764.crc-23-0196), 2023-09-29
Supplement: crc-23-0196-s08.pdf [file crc-23-0196-s08.pdf]

Supplementary Table S5. Correspondence between described targets and drugs

| <b>Target</b> | <b>Drug</b> |
|---------------|-------------|
| LCK           | A-770041    |
| EGFR          | Cetuximab   |
| EphB4         | EphB4_9721  |
| IGF1-R        | IGFR_3801   |
| PARP1,2,5a    | PARP_9482   |
| PARP1,2,7     | PARP_9495   |
| MEK1/2        | Refametinib |
| PARP5a, 5b    | TANK_1366   |
| LCK           | WH-4-023    |
| DSB inducer   | Bleomycin   |
| PI3K delta    | IC-87114    |
