# Supplementary material for: An Early Neoplasia Index (ENI10), Based on Molecular Identity of CD10 Cells and Associated Stemness Biomarkers, is a Predictor of Patient Outcome in Many Cancers
Source: PubMed Central journal article supplement (PMC10540743; doi:10.1158/2767-9764.crc-23-0196), 2023-09-29
Supplement: crc-23-0196-s09.pdf [file crc-23-0196-s09.pdf]

Supplementary Table S6. Correlation of ENI10 score with drug response of Sanger cell lines.

| drug        | n cell lines | r IC50              | pval IC50             | p IC50 BH             | signif.    |
|-------------|--------------|---------------------|-----------------------|-----------------------|------------|
| PARP_9482   | 370          | -0.216764322957314  | 0.0000260454997323774 | 0.000114860653819785  | yes        |
| EphB4_9721  | 667          | -0.203645438740534  | 1.12522668869774E-07  | 1.12778402208114E-06  | yes        |
| A-770041    | 247          | -0.192758015711124  | 0.00234506309628744   | 0.00642343369852647   | suggestive |
| IGFR_3801   | 359          | -0.187610836667159  | 0.000351424378517082  | 0.0011479863031558    | yes        |
| WH-4-023    | 239          | -0.184644516636722  | 0.00418013371313056   | 0.01065571657509      | suggestive |
| Cetuximab   | 687          | -0.169870551255391  | 7.57375922086577E-06  | 0.0000407320465414854 | yes        |
| PARP_9495   | 669          | -0.157238864033432  | 0.0000441111703256375 | 0.000181803982370151  | yes        |
| TANK_1366   | 733          | -0.139411382655261  | 0.000152793986443239  | 0.000556183149525432  | yes        |
| Refametinib | 1174         | -0.0915526117920456 | 0.00168841256956994   | 0.00486660093581923   | suggestive |
